# Supplementary figures and images for: Nanorod shape separation using surfactant assisted self-assemblyElectronic supplementary information (ESI) available: TEM of shape separated shorter nanorods mixed with some spheres and TEM of shape separated plates mixed with short nanorods and spheres. See http://www.rsc.org/suppdata/cc/b3/b303103a/
Source: Royal Society of Chemistry journal article supplement (doi:10.1039/b303103a), 2003-01-01

**Electronic supplementary Figure 1**

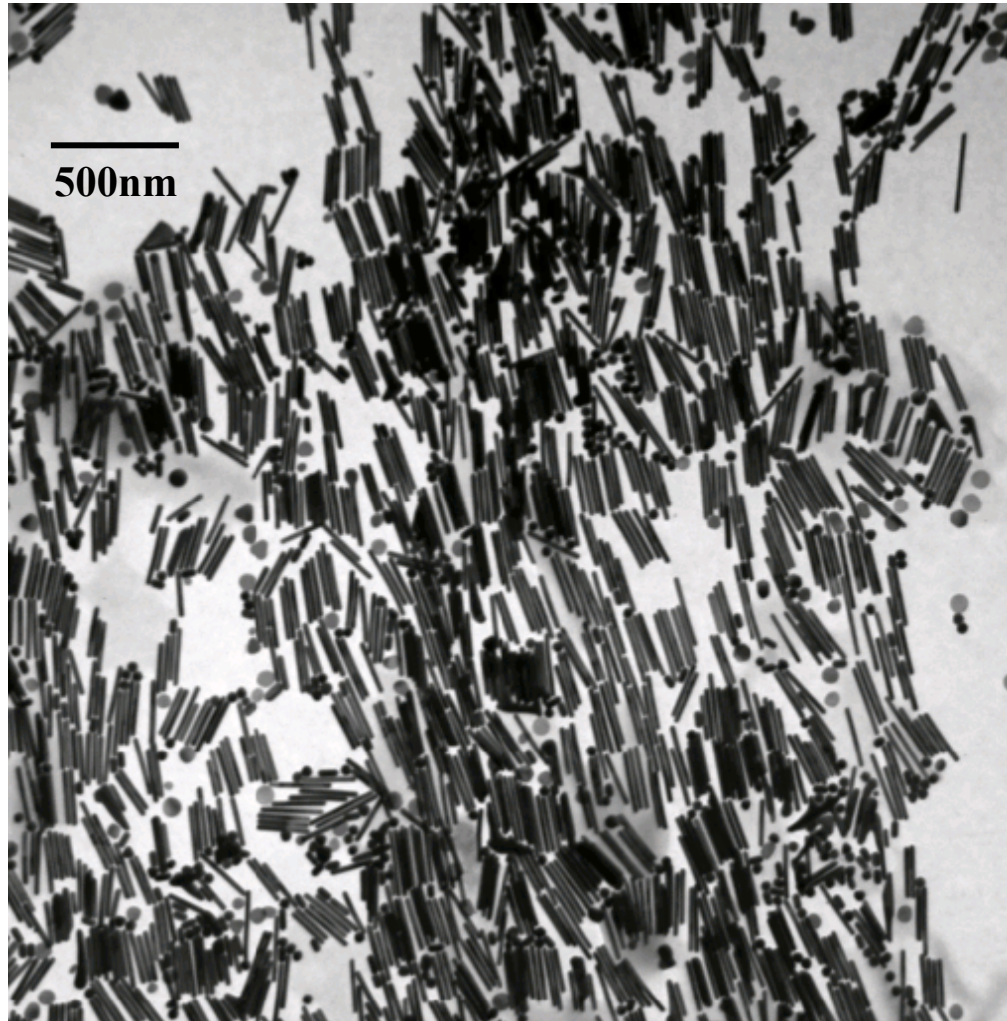

Supplement: b303103a-1.pdf [file b303103a-1.pdf]

**Electronic supplementary Figure 2**

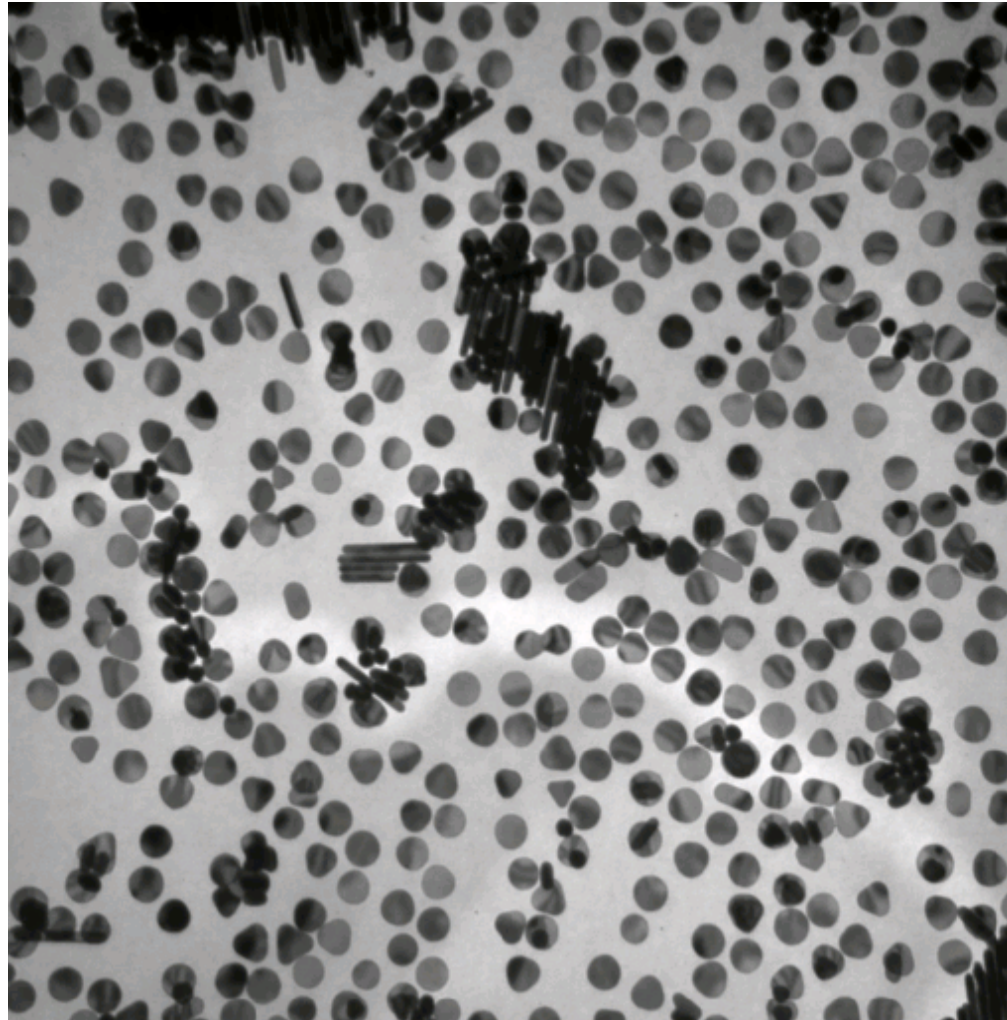

**—**  
**100nm**

Supplement: b303103a-2.pdf [file b303103a-2.pdf]
